# Supplementary material for: Structure and Nanomechanics of PPTA-CNT Composite Fiber: A Molecular Dynamics Study
Source: MDPI journal article supplement (doi:10.3390/nano12183136), 2022-09-09
Supplement: s1 [file s1]

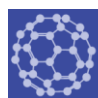

## Article

# Structure and Nanomechanics of PPTA-CNT Composite Fiber: A Molecular Dynamics Study

Tong Li <sup>\*,†</sup>, Zebei Mao <sup>†</sup>, Juan Du <sup>1</sup> and Zhuoyu Song

Department of Engineering Mechanics, Dalian University of Technology, Dalian 116024, China

\* Correspondence: tong@dlut.edu.cn; Tel.: +86-411-84706036

† These authors contributed equally to this work.

The force field parameters used in this paper are summarized in the following tables, which are 9-6 Lennard–Jones interaction, bond interaction, angle interaction, and dihedral interactions.

The derivation of force field parameters of the new CG molecules usually requires the inverse Monte Carlo method or the force-matching method to complete the parameterization after comparing with the all-atom simulation [1]. Multiple systems were created to obtain the calculation parameters based on the simulation results, including the bond interactions, angle interactions, dihedral interactions, and non-bonding interactions. The 9-6 Lennard–Jones interaction parameters are shown in Table S1, except for the interaction parameters of the N–O pair ( $\epsilon = 0.5393$  and  $\sigma = 3.6246$ ). The bond interaction parameters are shown in Table S2. The angle interaction parameters are shown in Table S3. The dihedral interaction parameters are shown in Table S4.

**Table S1.** Force field parameters of the 9-6 Lennard–Jones interaction of CG particles.

| Particle type                  | Mass  | $\epsilon$ (kcal/mol) | $\sigma$ (Å) |
|--------------------------------|-------|-----------------------|--------------|
| BR1                            | 12.01 | 0.1750                | 3.8000       |
| BR2                            | 26.04 | 0.1750                | 3.8000       |
| BR3                            | 26.04 | 0.1750                | 3.8000       |
| BR4                            | 12.01 | 0.1750                | 3.8000       |
| N                              | 15.01 | 0.2430                | 4.0506       |
| O                              | 28.01 | 0.3233                | 3.7880       |
| H <sub>2</sub> SO <sub>4</sub> | 98.08 | 0.9800                | 4.2700       |

**Table S2.** Force field parameters of the bond interaction of CG particles.

| type <i>i</i> | type <i>j</i> | $k_r$ (kcal/mol/Å <sup>2</sup> ) | $r_0$ (Å) |
|---------------|---------------|----------------------------------|-----------|
| BR1           | BR2           | 40.0                             | 1.911     |
| BR1           | BR3           | 40.0                             | 1.910     |
| BR1           | N             | 40.0                             | 1.447     |
| BR1           | O             | 30.0                             | 1.949     |
| BR2           | BR4           | 40.0                             | 1.910     |
| BR3           | BR4           | 40.0                             | 1.910     |
| BR4           | N             | 40.0                             | 1.447     |
| BR4           | O             | 30.0                             | 1.949     |
| N             | O             | 36.0                             | 1.872     |

**Table S3.** Force field parameters of the angle interaction of CG particles.

| type <i>i</i> | type <i>j</i> | type <i>k</i> | $k_{\theta,1}$ (kcal/mol/rad <sup>2</sup> ) | $\theta_{0,1}$ (Å) | $k_{\theta,1}$ (kcal/mol/rad <sup>2</sup> ) | $\theta_{0,2}$ (Å) |
|---------------|---------------|---------------|---------------------------------------------|--------------------|---------------------------------------------|--------------------|
| BR1           | BR2           | BR4           | 462.0                                       | 95.6               | 0.0                                         | 0.0                |
| BR1           | BR2           | COOH          | 129.0                                       | 137.0              | 0.0                                         | 0.0                |
| BR1           | N             | O             | 75.0                                        | 104.6              | 0.0                                         | 0.0                |
| BR1           | O             | N             | 214.0                                       | 79.5               | 0.0                                         | 0.0                |
| BR1           | BR3           | BR4           | 462.0                                       | 95.6               | 0.0                                         | 0.0                |
| BR2           | BR1           | BR3           | 445.0                                       | 84.4               | 0.0                                         | 0.0                |
| BR2           | BR1           | N             | 93.0                                        | 131.8              | 88.0                                        | 143.2              |
| BR2           | BR1           | O             | 127.0                                       | 118.5              | 96.0                                        | 156.0              |
| BR2           | BR4           | BR3           | 445.0                                       | 84.4               | 0.0                                         | 0.0                |
| BR2           | BR4           | N             | 93.0                                        | 131.8              | 88.0                                        | 143.2              |
| BR2           | BR4           | O             | 127.0                                       | 118.5              | 96.0                                        | 156.0              |
| BR3           | BR1           | N             | 93.0                                        | 131.8              | 88.0                                        | 143.2              |
| BR3           | BR1           | O             | 127.0                                       | 118.5              | 96.0                                        | 156.0              |
| BR3           | BR4           | N             | 93.0                                        | 131.8              | 88.0                                        | 143.2              |
| BR3           | BR4           | O             | 127.0                                       | 118.5              | 96.0                                        | 156.0              |
| BR4           | N             | O             | 75.0                                        | 104.6              | 0.0                                         | 0.0                |
| BR4           | O             | N             | 214.0                                       | 79.5               | 0.0                                         | 0.0                |

**Table S4.** Force field parameters of the dihedral interaction of CG particles.

| type <i>i</i> | type <i>j</i> | type <i>k</i> | type <i>l</i> | $k_1$  | $k_2$  | $k_3$ | $k_4$  |
|---------------|---------------|---------------|---------------|--------|--------|-------|--------|
| BR1           | BR2           | BR4           | BR3           | 0.000  | 14.375 | 0.000 | 0.000  |
| BR1           | BR2           | BR4           | N             | 10.000 | 0.000  | 0.000 | 0.000  |
| BR1           | BR2           | BR4           | O             | 5.000  | 0.000  | 0.000 | 0.000  |
| BR1           | BR3           | BR4           | BR2           | 0.000  | 14.375 | 0.000 | 0.000  |
| BR1           | BR3           | BR4           | N             | 10.000 | 0.000  | 0.000 | 0.000  |
| BR1           | BR3           | BR4           | O             | 5.000  | 0.000  | 0.000 | 0.000  |
| BR1           | N             | O             | BR4           | 33.100 | 0.000  | 0.000 | 0.000  |
| BR2           | BR1           | BR3           | BR4           | 0.000  | 14.375 | 0.000 | 0.000  |
| BR2           | BR1           | N             | O             | 0.084  | 0.364  | 0.068 | -0.236 |
| BR2           | BR1           | O             | N             | -0.148 | 0.620  | 0.272 | -0.026 |
| BR2           | BR4           | N             | O             | 0.084  | 0.364  | 0.068 | -0.236 |
| BR2           | BR4           | O             | N             | -0.148 | 0.620  | 0.272 | -0.026 |
| BR3           | BR1           | BR2           | BR4           | 0.000  | 14.375 | 0.000 | 0.000  |
| BR3           | BR1           | N             | O             | 0.084  | 0.364  | 0.068 | -0.236 |
| BR3           | BR1           | O             | N             | -0.148 | 0.620  | 0.272 | -0.026 |
| BR3           | BR4           | N             | O             | 0.084  | 0.364  | 0.068 | -0.236 |
| BR3           | BR4           | O             | N             | -0.148 | 0.620  | 0.272 | -0.026 |
| BR4           | N             | O             | BR1           | 33.100 | 0.000  | 0.000 | 0.000  |
| N             | BR1           | BR2           | BR4           | 10.000 | 0.000  | 0.000 | 0.000  |
| N             | BR1           | BR3           | BR4           | 10.000 | 0.000  | 0.000 | 0.000  |
| O             | BR1           | BR2           | BR4           | 5.000  | 0.000  | 0.000 | 0.000  |
| O             | BR1           | BR3           | BR4           | 5.000  | 0.000  | 0.000 | 0.000  |

## Reference

1. Mogurampelly, S.; Macdermaid, C.M.; Percec, S.; Klein, M.L.; Fiorin, G. Aggregation of poly (p-phenylene terephthalamide) chains: Emergence of fiber defects. *Phys. Rev. Mater.* **2019**, *3*, 015602.
